1 **COVID-19 pandemic increased the magnitude of mortality risks associated with**  
2 **cold temperature in Italy: A nationwide time-stratified case-crossover study**

3

4 Wenhua Yu<sup>1</sup>, Rongbin Xu<sup>1</sup>, Tingting Ye<sup>1</sup>, Chunlei Han<sup>1,2</sup>, Shanshan Li<sup>1\*</sup>, Yuming  
5 Guo<sup>1\*</sup>

6

7 **Affiliations:**

8 <sup>1</sup>Department of Epidemiology and Preventive Medicine, School of Public Health and  
9 Preventive Medicine, Monash University, Level 2, 553 St Kilda Road, Melbourne,  
10 VIC 3004, Australia.

11 <sup>2</sup>School of Public Health and Management, Binzhou Medical University. 346 Guanhai  
12 Road, Yantai, China, PR. China, 264003.

13

14 **\*Corresponding authors:**

15 1. Prof Yuming Guo, Department of Epidemiology and Preventive Medicine, School of Public  
16 Health and Preventive Medicine, Monash University. Level 2, 553 St Kilda Road, Melbourne,  
17 VIC 3004, Australia. Email: [yuming.guo@monash.edu](mailto:yuming.guo@monash.edu).

18 2. Dr. Shanshan Li, Department of Epidemiology and Preventive Medicine, School of Public  
19 Health and Preventive Medicine, Monash University. Level 2, 553 St Kilda Road, Melbourne,  
20 VIC 3004, Australia. Email: [shanshan.li@monash.edu](mailto:shanshan.li@monash.edu).

21

22 **Abstract**

23 **Backgrounds:** The coronavirus disease 2019 (COVID-19) pandemic and some  
24 containment measures have changed many people's lives and behaviours. Whether the  
25 pandemic could change the association between cold temperature and mortality remains  
26 unknown.

27 **Objectives:** We aimed to assess whether the association between cold temperature and  
28 all-cause mortality in the pandemic period has changed compared to non-COVID-19  
29 period (2015-2019) in Italy.

30 **Methods:** We collected daily all-cause mortality data and meteorological data for 107  
31 Italian provinces from 1, January 2015 to 31, May 2020. A time-stratified case-  
32 crossover design with the distributed lag non-linear model was used to examine the  
33 association between cold temperature and all-cause mortality during the first three  
34 months (from March to May in 2020) of the COVID-19 outbreak and the same months  
35 in 2015-2019.

36 **Results:** The relative risk (RR) of all-cause mortality at extreme cold temperature (2.5<sup>th</sup>  
37 percentile of temperature at 3 °C) in comparison with the minimum mortality  
38 temperature (24 °C) was 4.75 [95% confidence interval (CI): 3.90-5.79] in the pandemic  
39 period, which is more than triple higher than RR [1.41 (95% CI: 1.33-1.50)] in the same  
40 months during 2015-2019. The shift in cold-mortality association was particularly  
41 significant for people aged 65-74 years [RR (95% CI): 5.98 (3.78-9.46) in 2020 versus  
42 1.29 (1.10-1.51) in 2015-2019], 75-84 years [5.25 (3.79-7.26) versus 1.40 (1.25-1.56)],  
43 and ≥ 85 years [5.03 (3.90-6.51) versus 1.52 (1.39-1.66)], but not significant for those  
44 aged 0-64 years [1.95 (1.17-3.24) versus 1.24 (1.05-1.48)].

45 **Conclusion:** The findings suggest that the COVID-19 pandemic enhanced the risk of  
46 cold temperature on mortality in Italy, particularly among the elderly people. Further

47 studies are warranted to understand the exact mechanism when detailed data are  
48 available.

49

50

## 51 **1. Introduction**

52 With the coronavirus disease 2019 (COVID-19) infection sweeping across the globe at  
53 a startling speed (Bedford et al. 2020), restrictive social containment measures such as  
54 social distance, travel restriction, and regional emergency lockdown, have been widely  
55 implemented to limit viral diffusion and reduce deaths from infection. Italy was one of  
56 the countries with the largest number of confirmed cases at the beginning of the  
57 COVID-19 outbreak. Since the first local transmission started on the 20<sup>th</sup> of February,  
58 the number of reported cases had followed an exponential trend, peaking with 6,557  
59 new cases on the 21<sup>st</sup> of March. Simultaneously, restrictive lockdown measures were  
60 implemented to the whole country from the 9<sup>th</sup> of March and were not downgraded until  
61 the end of May 2020.

62  
63 The restricted activities have caused profound changes in people's lives and behaviours.  
64 For example, stay-at-home orders would directly decrease outdoor physical activities  
65 (Wang et al. 2020) and change the pattern of social contacts (Prem et al. 2020). It may  
66 also indirectly lead to the damage of health through delayed health care for acute  
67 emergencies (De Filippo et al. 2020; De Rosa et al. 2020), exacerbations of chronic  
68 diseases (Wang and Zhang 2020), and psychological depression (Weinberger et al.  
69 2020). Moreover, the effect of the pandemic on overall population mortality is unknown.  
70 Several recent studies (Banerjee et al. 2020; Weinberger et al. 2020) reported that the  
71 overall direct and indirect deaths related to COVID-19 may be underestimated in the  
72 pandemic period due to the social containment and mitigation activities. Therefore, it  
73 is worthwhile to assess the impact of the pandemic on the overall population health in  
74 Italy.

75

76 The association between ambient temperature and mortality/morbidity outcomes has  
77 been well-documented (Gasparrini et al. 2015; Guo et al. 2014). Apart from  
78 hypothermia, many adverse health outcomes like cardiovascular and respiratory  
79 diseases are associated with both cold and hot temperatures (Guo et al. 2016a; Zhao et  
80 al. 2019a; Zhao et al. 2019b). However, the nature of the temperature-mortality  
81 relationship in different climates and populations may exhibit significant variation  
82 (Carder et al. 2005; Gasparrini et al. 2015). Generally, the non-linear temperature-  
83 mortality association is mainly described as a J-, V- or U-shaped curve in different  
84 regions and countries worldwide (Gasparrini et al. 2015; Guo et al. 2013; Guo et al.  
85 2014; Ryti et al. 2016). The association could be affected by factors like geographic  
86 locations, climatological and socioeconomic conditions, and human behaviours  
87 (Gasparrini et al. 2015). Therefore, it is warranted to explore the association between  
88 the temperature and the mortality during the pandemic period when people's lives and  
89 behaviours have been hugely altered due to the restrictive social interventions.

90  
91 Several previous assessments have focused on the effects of temperature variation on  
92 the death of COVID-19 (Briz-Redón and Serrano-Aroca 2020; Ma et al. 2020; Xie and  
93 Zhu 2020; Yao et al. 2020). However, the number of COVID-19 deaths in official  
94 reports is likely underestimated due to improper COVID-19 death certification or the  
95 lack of testing availability (Gill and DeJoseph 2020). As a result, many deaths may  
96 suffer from misclassification to another respiratory disease, such as influenza. Unlike  
97 the deaths attributed to COVID-19, all-cause mortality could be an accurate  
98 measurement to estimate the direct and indirect effects of the pandemic on deaths  
99 (Zylke and Bauchner 2020). Apart from avoiding the common misclassification of  
100 cause-specific mortality, all-cause mortality incorporates both the deaths from the virus

101 and the mortality indirectly from the pandemic. For example, the incidence of out-of-  
102 hospital cardiac arrest was significantly higher during the pandemic period in Italy than  
103 that at the same time in 2019 (Baldi et al. 2020; Marijon et al. 2020). Such indirect  
104 deaths from the pandemic may increase because of the avoidance of health care or the  
105 lack of social supports, especially for the vulnerable population who are concerned  
106 about being infected when going to a hospital (Baum and Schwartz 2020; Marijon et al.  
107 2020; Rosenbaum 2020). The overlap of vulnerable populations in COVID-19 and  
108 temperature-related diseases makes the measurement of the pandemic impacts  
109 complexed. Thus, all-cause mortality could be a useful tool to comprehensively assess  
110 the impact of temperature on human health in the pandemic.

111

112 In this study, we aimed to identify the risk of all-cause mortality associated with  
113 temperature in the early spread period of COVID-19 across the 107 Italian provinces  
114 between March 1<sup>st</sup>, 2020 and May 31<sup>st</sup>, 2020, and compare the association with that  
115 during the same period in 2015-2019. We also performed stratified analyses by sex and  
116 age to estimate the influence of temperature on different population in the pandemic  
117 period in Italy.

118

## 119 **2. Methods**

### 120 **2.1 Data collection**

121 We collected daily all-cause mortality data for 7,904 municipalities in 107 provinces of  
122 Italy from the Italian Institute of Statistics from January 1<sup>st</sup>, 2015 to May 31<sup>st</sup>, 2020,  
123 which covered about 93.1% of the Italian territory and population. The mortality counts  
124 were grouped into province-level stratified by sex and age. To compare the effects of  
125 temperature on mortality before and during the COVID-19 pandemic, the analysis was

126 restricted to the first three months of the COVID-19 outbreak in Italy in 2020 and the  
127 same months during 2015-2019, respectively.

128

129 We collected the hourly ambient temperature (at 2 meters above the land surface) and  
130 ambient dew point temperature at  $0.1^\circ \times 0.1^\circ$  spatial resolution from the ERA5 dataset  
131 (ERA5) (<https://cds.climate.copernicus.eu/cdsapp#!/home>). We aggregated all hourly  
132 observations into daily data. This dataset has good temporal and spatial coverage in  
133 Italy, but it might be less accurate than observations from weather stations. Thus, we  
134 calibrated the ERA5 daily mean temperature and ERA5 daily mean dew point  
135 temperature using their relationship with observations of weather stations by building  
136 random forest models (see Supplementary materials for detail, Fig. S1-S2). After  
137 calibration, the ERA5 daily mean temperature and ERA5 daily mean dew point  
138 temperatures were linked to the geographical centre of each of the 7,904 municipalities  
139 based on longitude and latitude. We then calculated daily mean relative humidity from  
140 the calibrated ERA5 daily mean temperature and ERA5 daily mean dew point  
141 temperature using an algorithm provided by the “humidity” R package (Cai 2019).  
142 Weather data at municipality level were aggregated into province level by averaging  
143 observations of all municipalities within each province. We also collected the daily  
144 monitor stations data of particulate matter with diameters less than 2.5 micrometres  
145 (PM<sub>2.5</sub>) from World's Air Quality Index Project and linked values of the nearest monitor  
146 station to the centre of each Italian province.

147

## 148 2.2 Statistics analysis

149 A time-stratified case-crossover design was used to examine the associations between  
150 temperature and mortality during the first three months of COVID-19 outbreak and the

151 same pre-outbreak period in 2015-2019, respectively. Conditional quasi-Poisson  
152 regression was applied to perform the time-stratified case-crossover design (Armstrong  
153 et al. 2014). Time-stratified case-crossover design controls the temporal trends and  
154 seasonality through matching case and control in a small time window (e.g., calendar  
155 month) (Guo et al. 2011). Specifically, the case and controls were matched by the day  
156 of the week in the same calendar month in the same province, to control for the effect  
157 of intra-week variation, seasonality, and spatial variation. The association between  
158 ambient temperature and risk of death was examined using a distributed lag non-linear  
159 model (DLNM) (Gasparrini et al. 2010). We used a natural cubic spline with 3 degrees  
160 of freedom for the temperature distribution, and a natural cubic spline with 3 degrees  
161 of freedom for lags up to 21 days. We chose a lag of 21 days, as previous studies have  
162 shown a long lag effect of cold temperature and harvesting effect of hot temperature  
163 (Gasparrini et al. 2015; Guo et al. 2011). The daily relative humidity with the same lag  
164 days and PM<sub>2.5</sub> concentration were included in the model to control their impacts.

165

166 To assess the possible modification effects of demographic factors on the associations  
167 between temperature and mortality, stratified analyses were conducted for sex and age  
168 groups (<64, 65-74, 75-84, and  $\geq 85$  years). Our initial analyses show there were only  
169 cold effects on mortality (no hot effects). Therefore, the overall cumulative RRs in  
170 previous 21 days corresponding to the 2.5<sup>th</sup> percentile and the 50<sup>th</sup> percentile of the  
171 temperature distribution during the study period against the minimum mortality  
172 temperature (MMT) were calculated to show the effects of extreme and moderately  
173 cold temperatures, respectively. We set 24°C as MMT (reference value/temperature)  
174 based on our initial analyses and a previous study to calculate the relative risks (RRs)  
175 (Gasparrini et al. 2015).



176

### 177 2.3 Sensitivity analysis

178 Sensitivity analyses were performed to examine the robustness of the results. We tested  
179 the variation of the temperature-mortality association during non-outbreak of COVID-  
180 19 by replacing the study period of 2015-2019 with every single year of the study period.  
181 We modified the lag choices by varying the maximum lags to 18 and 24 days in the  
182 DLNM to check any changes in the cold temperature-mortality associations.

183

184 All analyses were performed with R software (version 3.5.2). The ‘dlnm’ and ‘gnm’  
185 packages were used to fit the DLNM and the conditional Poisson regression,  
186 respectively.

187

### 188 3. Results

189 There were 1,000,459 all-cause deaths from March 1<sup>st</sup> to May 31<sup>st</sup> during 2015-2020 in  
190 Italy. Table 1 shows the comparison of descriptive statistics between the COVID-19  
191 pandemic period in 2020 and the same months during 2015-2019. The study months in  
192 the pandemic period in Italy witnessed a slight increase in the ambient temperature  
193 ( $P < 0.001$ ) with the average value of  $12.5 \pm 4.4$  °C compared with the same months  
194 during 2015-2019 ( $12.3 \pm 4.3$  °C). In addition, the relative humidity and PM<sub>2.5</sub> in the  
195 pandemic period were significantly lower than the same months during 2015-2019. As  
196 for the comparison of the daily average all-cause mortality counts in different age  
197 groups, all age groups displayed statistical higher counts in 2020 than the number in  
198 2015-2019, except for the 0-64 age group. The death counts in the pandemic period  
199 experienced a significantly high number in male and female groups.

200

201 Table 1 Descriptive statistics for temperature, relative humidity, PM<sub>2.5</sub>, and daily death  
202 counts during COVID-19 pandemic in 2020 and the same months during 2015-2019.

| Characteristics                        | 2015-2019 |       | 2020  |       | <i>p</i> -<br>Value |
|----------------------------------------|-----------|-------|-------|-------|---------------------|
|                                        | Mean      | SD    | Mean  | SD    |                     |
| Temperature (°C)                       | 12.35     | 4.29  | 12.52 | 4.40  | <0.001              |
| Relative Humidity (%)                  | 68.80     | 11.15 | 65.41 | 12.08 | <0.001              |
| PM <sub>2.5</sub> (µg/m <sup>3</sup> ) | 16.56     | 13.01 | 13.86 | 9.96  | <0.001              |
| Daily Average Mortality counts         |           |       |       |       |                     |
| 0-64 years                             | 192       | 17    | 196   | 37    | 0.097               |
| 65-74 years                            | 235       | 21    | 285   | 84    | <0.001              |
| 75-84 years                            | 519       | 45    | 634   | 204   | <0.001              |
| ≥ 85 years                             | 802       | 78    | 1021  | 277   | <0.001              |
| Female                                 | 911       | 80    | 1093  | 271   | <0.001              |
| Male                                   | 837       | 62    | 1043  | 325   | <0.001              |
| Total                                  | 1748      | 135   | 2136  | 590   | <0.001              |

203 Note: 2020: the pandemic period from March 1st to May 31<sup>st</sup> 2020; 2015-2019: the  
204 normal period from March 1st to May 31st for 2015-2019; SD: Standard deviation;  
205 PM<sub>2.5</sub>: particulate matter with diameters less than 2.5 micrometres; Daily temperature  
206 and relative humidity were calculated with the 24h average values; p-Value was  
207 calculated with independent Two-Sample t-Test.

208

209 Figure 1 shows overall cumulative exposure-response associations for the pandemic  
210 period in 2020 and the same pre-outbreak period in 2015-2019, referring to the MMT  
211 of 24°C. Generally, there were only cold effects on mortality for both 2020 COVID-19

212 pandemic and the same months during 2015-2019. The risks of excess mortality  
213 associated with cold temperatures in the pandemic period were significantly higher than  
214 that in the 2015-2019 period. A similar trend can be found in sex and age groups (Figure  
215 2). There were similar temperature-mortality curves for males and females. As for the  
216 age-specific temperature-mortality association, except for the 0-64 age group, the other  
217 three older age groups experienced a significantly higher risk of death in the pandemic  
218 period than 2015-2019.  
219

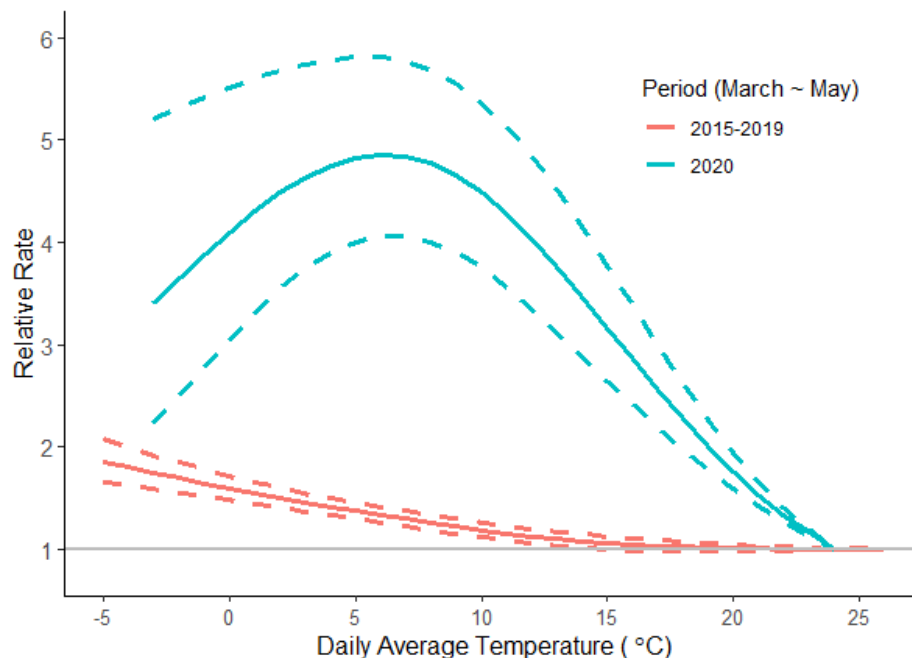

220  
221 Fig. 1 Cumulative temperature–mortality associations along 21 lag days in 2020  
222 COVID-19 pandemic and the same months during 2015-2019.

223  
224 The cumulative RR of all-cause mortality associated with extreme cold (2.5<sup>th</sup> percentile  
225 of temperature at 3 °C) in comparison with the MMT (24 °C) was 4.75 (95%CI: 3.90-  
226 5.79) in the pandemic period, which is more than three times higher than the 2015-2019  
227 period with RR of 1.41 (95%CI: 1.33-1.50). With regards to the association of mortality

228 in moderately cold temperature (50<sup>th</sup> percentile of temperature at 14°C), Italy had a  
 229 cumulative RR of 3.75 (95%CI: 3.12-4.52) in the pandemic period compared with that  
 230 in the non-pandemic period with an RR of 1.10 (95%CI: 1.03-1.17). When compared  
 231 the risks at extreme and moderately cold temperatures in specific-age groups in the  
 232 pandemic period, the 65-74 age group reported significantly higher risks than the other  
 233 three groups at extreme and moderately cold temperatures in the pandemic, while the  
 234 0-64 age group showed the similar RR values at these two temperatures (Table 2).

235

236 Table 2. Relationship between temperature and mortality at extreme and moderately  
 237 cold temperatures.

| Sex/age     | Extreme Cold |              |      |              | Moderately Cold |              |      |              |
|-------------|--------------|--------------|------|--------------|-----------------|--------------|------|--------------|
|             | 2015-2019    |              | 2020 |              | 2015-2019       |              | 2020 |              |
|             | RR           | 95% CI       | RR   | 95% CI       | RR              | 95% CI       | RR   | 95% CI       |
| 0-64 years  | 1.24         | (1.05, 1.48) | 1.95 | (1.17, 3.24) | 1.10            | (0.92, 1.31) | 2.04 | (1.28, 3.26) |
| 65-74 years | 1.29         | (1.10, 1.51) | 5.98 | (3.78, 9.46) | 1.00            | (0.85, 1.18) | 4.12 | (2.70, 6.31) |
| 75-84 years | 1.40         | (1.25, 1.56) | 5.25 | (3.79, 7.26) | 1.13            | (1.01, 1.26) | 3.94 | (2.90, 5.34) |
| ≥ 85 years  | 1.52         | (1.39, 1.66) | 5.03 | (3.90, 6.51) | 1.12            | (1.02, 1.29) | 4.01 | (3.14, 5.11) |
| Female      | 1.47         | (1.35, 1.59) | 4.72 | (3.69, 6.03) | 1.11            | (1.02, 1.21) | 3.89 | (3.09, 4.90) |
| Male        | 1.36         | (1.25, 1.48) | 4.78 | (3.67, 6.22) | 1.09            | (0.99, 1.19) | 3.59 | (2.80, 4.60) |
| Total       | 1.41         | (1.33, 1.50) | 4.75 | (3.90, 5.79) | 1.10            | (1.03, 1.17) | 3.75 | (3.12, 4.52) |

238 Extreme Cold: the 2.5<sup>th</sup> percentile of the temperature (3 °C); Moderately Cold: the 50<sup>th</sup>  
 239 percentile of the temperature (14 °C); RR: overall cumulative relative risk of death in  
 240 previous 21 days, compared with the minimum mortality temperature of 24°C; 95% CI:  
 241 The 95% Confidence Interval. 2020: the pandemic period from March 1st to May 31st,  
 242 2020; 2015-2019: the normal period from March 1st to May 31st for each year.

243

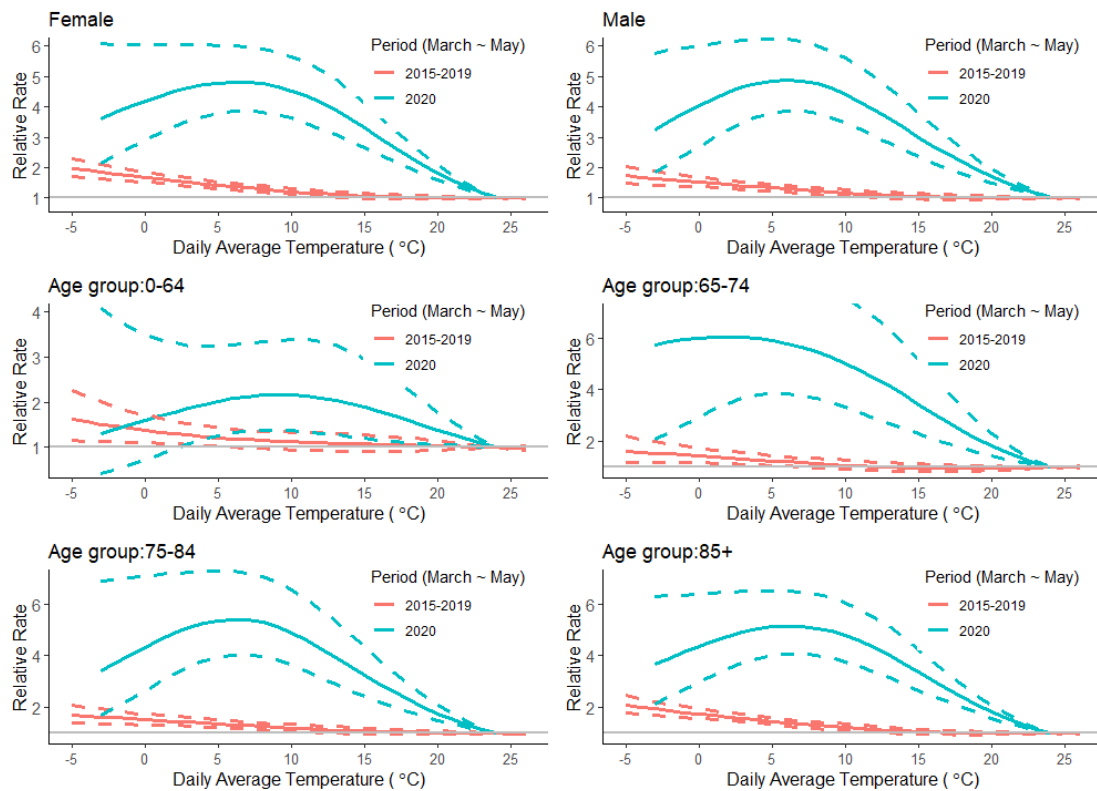

244

245 Fig. 2 Cumulative exposure–response associations along 21 lag days stratified by sex  
246 and age in the pandemic (2020) and the non-pandemic period (2015-2019).

247

248 As for the results of sensitivity analysis, the distribution of the temperatures in the same  
249 period of 2015-2020 was similar, except for a slightly low temperature in the year 2019  
250 (Table S1). We replaced the study period of 2015-2019 with every single year from  
251 2015 to 2019 to examine the stability of the association between temperature and all-  
252 cause mortality in the period with no pandemic, which gave similar results (Fig. S3).  
253 Additionally, we changed the maximum lags days to 18 and 24 days in our model, and  
254 it did not modify the results (Fig. S4). Consequently, we believe that our models  
255 adequately captured the main effects of temperature on mortality.

256

#### 257 4. Discussion

258 To the best of our knowledge, our study is the first to investigate the cold-related excess

259 mortality during the COVID-19 pandemic period in Italy, even in the world. The  
260 findings indicated that Italy experienced a higher cold-related excess mortality during  
261 the pandemic in comparison to the equivalent time in 2015-2019. The mortality risks  
262 associated with cold temperatures observed during the pandemic were more than triple  
263 higher than risks noted in 2015-2019 at both extreme and moderately cold temperatures.  
264 Furthermore, risks in individuals with 0-64 year of age displayed a non-significant  
265 difference in the pandemic and non-pandemic periods. However, people aged  $\geq 65$   
266 years old were more susceptible to the adverse effects of cold temperature than those  
267  $< 65$  years old during the pandemic.

268

269 It is well-documented that cold temperature is responsible for the excess mortality (Guo  
270 et al. 2016b; Schwartz et al. 2015; Vardoulakis et al. 2014). For example, a quantitative  
271 systematic review estimated that cold exposure was associated with an elevated risk of  
272 cardiovascular and respiratory mortality (Bunker et al. 2016). Our results for the non-  
273 pandemic period are consistent with a previous multi-country epidemiological study  
274 (Gasparrini et al. 2015), in which it assessed the all-cause mortality risk attributed to  
275 ambient temperature in Italian 11 cities from 1987 to 2010 and observed a slightly low  
276 cold-related mortality, with an RR of 1.09 in cold temperature. However, the results  
277 could not be directly compared due to the different study period.

278

279 Various potential biological mechanisms for the effect of cold temperature on the  
280 increased mortality risks have been presented, mainly for cardiovascular and  
281 respiratory effects (Song et al. 2017). In the case of the association of cold temperature  
282 with cardiovascular mortality, cold exposure could increase the angiotensin-II levels in  
283 plasma, platelet and red cell counts, blood viscosity, and arterial pressure, which would

284 lead to increased blood pressure and the elevated risks of hypertension and  
285 cardiovascular diseases (Analitis et al. 2008; Keatinge et al. 1984). The mechanisms  
286 behind the respiratory effects may be associated with the effect of cold temperature on  
287 the reduction of respiratory defences against infection and other immunological  
288 reactions (Eccles 2002). Meanwhile, the cold temperature could affect the transmission  
289 of viruses and enhance the rates of respiratory virus infection (Pica and Bouvier 2014).

290

291 Our results show that more than three times higher cold-related excess mortality during  
292 2020 COVID-19 pandemic than the same months during 2015-2019. Even though the  
293 potential drivers for such change cannot be directly derived, a multitude of underlying  
294 factors are linked to the variation of the cold-mortality association in the pandemic  
295 period. Firstly, the contributions of COVID-19 deaths to the cold-related excess  
296 mortality need to be taken into account. According to a recent report, in the first 5  
297 months of 2020 (with the 191,228 total deaths in Italy), 31,763 (16.6%) was of subjects  
298 with swab positive for COVID-19, but the mortality contribution varied by different  
299 prevalence locations ranging from 28% in high prevalence to 3% in low-prevalence  
300 provinces (National Statistical Institute (Istat) and the InstituteSuperiore di Sanità (Iss)  
301 2020). It is noted that the role of ambient temperature in the spread of COVID-19, so  
302 far, is not well understood. Obviously, the virus could not subside with the warming of  
303 temperature in the world. However, the impact of cold air temperature on COVID-19  
304 is more convincing. Several laboratory experiments have suggested lower temperatures  
305 are associated with increased survival of the virus (Casanova et al. 2010). Sajadi and  
306 colleagues concluded that the early spread of COVID-19 was consistent with the  
307 behavior of a seasonal respiratory by examining the global spread of the COVID-19  
308 (Sajadi et al. 2020). Many recent investigations also demonstrated a positive association

309 between cold temperature and COVID-19 risk. For example, an epidemiologic study  
310 with 122 Chinese cities estimated a positive association with a 4.86% increase in the  
311 daily number of COVID-19 confirmed cases for each 1 °C rise when temperatures  
312 below 3 °C (Xie and Zhu 2020).

313

314 In addition, another possible explanation for the association change in the pandemic  
315 period could be the adaptation of societies to cold temperature (Gasparrini et al. 2017;  
316 Schwartz et al. 2015). Specifically, the variation of temperature-mortality association  
317 mainly depends on the combination of two pathways: an intrinsic adaptation by a  
318 physiological acclimatisation response, and the extrinsic adaptation due to non-climate  
319 driven factors such as socioeconomic and demographic conditions and public health  
320 services (Achebak et al. 2020; Vicedo-Cabrera et al. 2018). Especially for the early  
321 days of the COVID-19 outbreak, extrinsic factors such as the health-care resource  
322 availability could play an important role in the change of the vulnerability. The rapid  
323 surge of COVID-19 cases has posed a serious threat to the Italian national health system  
324 (Remuzzi and Remuzzi 2020). Because of the lack of medical resources (Ji et al. 2020)  
325 and reorganization of the health care systems to the enormous increase in acutely  
326 COVID-19 patients, some patients died at home while awaiting admission (Emanuel et  
327 al. 2020), which might be caused by cold temperatures (Achebak et al. 2019; Yang et  
328 al. 2017). For example, there was a significant decrease in the rate of hospital admission  
329 for acute coronary syndrome and acute myocardial infarction during the early stage of  
330 the COVID-19 outbreak in Italy (De Filippo et al. 2020; De Rosa et al. 2020).

331

332 On the other hand, further important consideration is that the adverse psychosocial  
333 effects of pandemics (Guessoum et al. 2020) may be related to the individuals' intrinsic



334 physiological and psychological vulnerability to cold temperature. For example,  
335 research revealed that social exclusion could make people feel cold (Zhong and  
336 Leonardelli 2008). Several studies also observed that ambient temperatures are  
337 associated with the increase in emergency department visits for mental illness, suicides,  
338 and self-reported days of poor mental health (Mullins and White 2019; Xue et al. 2019).  
339 Restrictive social containment measures (including stay-at-home orders, quarantine,  
340 and isolation) may exacerbate the adverse psychological outcomes and mental disorders,  
341 resulting in excess cold-related mortality (Pfefferbaum and North 2020).

342

343 We also investigated the discrepancy effects by sex and age groups in the pandemic.  
344 The difference in temperature-related mortality between sex and age groups may be  
345 largely driven by a thermoregulatory pathway. Some studies suggested that men have  
346 larger decreases in core body temperature when exposed to cold, and thus are more  
347 susceptible to cold than women, whereas other studies reported the opposite (Achebak  
348 et al. 2019; Moghadamnia et al. 2017). The ability to maintain body temperature for  
349 males and females may differ with health and socioeconomic conditions  
350 (Moghadamnia et al. 2017). With regards to the age-specific differences in  
351 thermoregulatory during exposure to cold temperature, older people generally respond  
352 with reduced peripheral vasoconstriction and decreased metabolic heat production in  
353 comparison with younger individuals (Achebak et al. 2019; Stocks et al. 2004).  
354 Additionally, multiple factors other than physiological mechanisms could explain the  
355 discrepancies in pandemic cold-related mortality between different age groups. One  
356 possible explanation for the pronounced gap in the RRs between the 65-74 age group  
357 and other older groups is the health-related behaviours. For example, the older  
358 individuals may be more concerned about their vulnerability of COVID-19 infection

359 and are more willing to conduct personal protection measures such as wearing masks  
360 and staying indoors and thus avoid direct to cold exposures and infectious diseases.

361

362 There are some limitations in this study. First, we did not include the analysis of the  
363 disease-specific mortality because the data was not available. Therefore, we did not  
364 know the extent of the temperature impact on certain disease-specific mortality in the  
365 pandemic. An additional limitation is that this is an ecological study without individual  
366 data. Therefore, exposure misclassification is a potential concern. For example, the  
367 aggregated ambient temperature at a province-level does not necessarily remain  
368 consistent for individuals, specifically for people who may reduce the cold exposure  
369 because of keeping the stay-at-home orders during the pandemic. Furthermore, we were  
370 unable to make any inference in terms of the possible mechanism pathways governing  
371 the association between cold exposure and excess mortality in the pandemic.

372

373 In conclusion, our findings suggest that COVID-19 pandemic increased the impacts of  
374 cold temperatures on mortality in Italy. This means that using the historical exposure-  
375 response relationship between temperature and mortality may underestimate the health  
376 impacts of cold temperatures during the COVID-19 pandemic. To date, no sign shows  
377 the end of the COVID-19 pandemic before the widespread use of vaccines. Some  
378 restrictive social containment measures may continually affect our life and behaviour  
379 in the foreseeable future. Therefore, we would expect our findings enable public health  
380 agencies to take early actions such as making preparedness for indoor temperature  
381 control, developing early cold warning systems, and giving special attention to the  
382 vulnerable group, to avoid the unexpected cold-related excess mortality in the next  
383 coming winter.

## 384 Reference

- 385 Achebak H, Devolder D, Ballester J. 2019. Trends in temperature-related age-specific and  
386 sex-specific mortality from cardiovascular diseases in Spain: A national time-series  
387 analysis. *The Lancet Planetary Health* 3:e297-e306.
- 388 Achebak H, Devolder D, Ingole V, Ballester J. 2020. Reversal of the seasonality of  
389 temperature-attributable mortality from respiratory diseases in Spain. *Nature*  
390 *communications* 11:1-9.
- 391 Analitis A, Katsouyanni K, Biggeri A, Baccini M, Forsberg B, Bisanti L, et al. 2008. Effects of  
392 cold weather on mortality: Results from 15 European cities within the Pheweb project.  
393 *American journal of epidemiology* 168:1397-1408.
- 394 Armstrong BG, Gasparrini A, Tobias A. 2014. Conditional Poisson models: A flexible  
395 alternative to conditional logistic case cross-over analysis. *BMC medical research*  
396 *methodology* 14:122.
- 397 Baldi E, Sechi GM, Mare C, Canevari F, Brancaglione A, Primi R, et al. 2020. Out-of-hospital  
398 cardiac arrest during the COVID-19 outbreak in Italy. *New England Journal of Medicine*.
- 399 Banerjee A, Pasea L, Harris S, Gonzalez-Izquierdo A, Torralbo A, Shallcross L, et al. 2020.  
400 Estimating excess 1-year mortality associated with the COVID-19 pandemic according to  
401 underlying conditions and age: A population-based cohort study. *The Lancet*.
- 402 Baum A, Schwartz MD. 2020. Admissions to Veterans Affairs hospitals for emergency  
403 conditions during the COVID-19 pandemic. *JAMA*.
- 404 Bedford J, Enria D, Giesecke J, Heymann DL, Ihekweazu C, Kobinger G, et al. 2020. COVID-  
405 19: Towards controlling of a pandemic. *The Lancet* 395:1015-1018.
- 406 Briz-Redón Á, Serrano-Aroca Á. 2020. A spatio-temporal analysis for exploring the effect  
407 of temperature on COVID-19 early evolution in Spain. *Science of the Total*  
408 *Environment*:138811.
- 409 Bunker A, Wildenhain J, Vandenberg A, Henschke N, Rocklöv J, Hajat S, et al. 2016.  
410 Effects of air temperature on climate-sensitive mortality and morbidity outcomes in the  
411 elderly; a systematic review and meta-analysis of epidemiological evidence. *EBioMedicine*  
412 6:258-268.
- 413 Cai J. 2019. Humidity: Calculate water vapor measures from temperature and dew point.  
414 Available: <https://cran.r-project.org/web/packages/humidity/index.html>.
- 415 Carder M, McNamee R, Beverland I, Elton R, Cohen G, Boyd J, et al. 2005. The lagged  
416 effect of cold temperature and wind chill on cardiorespiratory mortality in Scotland.  
417 *Occupational and environmental medicine* 62:702-710.
- 418 Casanova LM, Jeon S, Rutala WA, Weber DJ, Sobsey MD. 2010. Effects of air temperature  
419 and relative humidity on coronavirus survival on surfaces. *Applied and environmental*  
420 *microbiology* 76:2712-2717.
- 421 De Filippo O, D'Ascenzo F, Angelini F, Bocchino PP, Conrotto F, Saglietto A, et al. 2020.  
422 Reduced rate of hospital admissions for ACS during COVID-19 outbreak in northern Italy.  
423 *New England Journal of Medicine*.
- 424 De Rosa S, Spaccarotella C, Basso C, Calabrò MP, Curcio A, Filardi PP, et al. 2020.  
425 Reduction of hospitalizations for myocardial infarction in Italy in the COVID-19 era.  
426 *European heart journal* 41:2083-2088.
- 427 Eccles R. 2002. An explanation for the seasonality of acute upper respiratory tract viral  
428 infections. *Acta oto-laryngologica* 122:183-191.

429 Emanuel EJ, Persad G, Upshur R, Thome B, Parker M, Glickman A, et al. 2020. Fair  
430 allocation of scarce medical resources in the time of covid-19. *Mass Medical Soc.*

431 Gasparrini A, Armstrong B, Kenward MG. 2010. Distributed lag non-linear models.  
432 *Statistics in medicine* 29:2224-2234.

433 Gasparrini A, Guo Y, Hashizume M, Lavigne E, Zanobetti A, Schwartz J, et al. 2015.  
434 Mortality risk attributable to high and low ambient temperature: A multicountry  
435 observational study. *The Lancet* 386:369-375.

436 Gasparrini A, Guo Y, Sera F, Vicedo-Cabrera AM, Huber V, Tong S, et al. 2017. Projections  
437 of temperature-related excess mortality under climate change scenarios. *The Lancet*  
438 *Planetary Health* 1:e360-e367.

439 Gill JR, DeJoseph ME. 2020. The importance of proper death certification during the  
440 covid-19 pandemic. *JAMA*.

441 Guessoum SB, Lachal J, Radjack R, Carretier E, Minassian S, Benoit L, et al. 2020.  
442 Adolescent psychiatric disorders during the covid-19 pandemic and lockdown. *Psychiatry*  
443 *research*:113264.

444 Guo Y, Barnett AG, Pan X, Yu W, Tong S. 2011. The impact of temperature on mortality  
445 in tianjin, china: A case-crossover design with a distributed lag nonlinear model.  
446 *Environmental health perspectives* 119:1719-1725.

447 Guo Y, Li S, Zhang Y, Armstrong B, Jaakkola JJ, Tong S, et al. 2013. Extremely cold and  
448 hot temperatures increase the risk of ischaemic heart disease mortality: Epidemiological  
449 evidence from china. *Heart* 99:195-203.

450 Guo Y, Gasparrini A, Armstrong B, Li S, Tawatsupa B, Tobias A, et al. 2014. Global variation  
451 in the effects of ambient temperature on mortality: A systematic evaluation. *Epidemiology*  
452 *(Cambridge, Mass)* 25:781.

453 Guo Y, Gasparrini A, Armstrong BG, Tawatsupa B, Tobias A, Lavigne E, et al. 2016a.  
454 Temperature variability and mortality: A multi-country study. *Environmental health*  
455 *perspectives* 124:1554-1559.

456 Guo Y, Li S, Li Liu D, Chen D, Williams G, Tong S. 2016b. Projecting future temperature-  
457 related mortality in three largest australian cities. *Environmental pollution* 208:66-73.

458 Ji Y, Ma Z, Peppelenbosch MP, Pan Q. 2020. Potential association between covid-19  
459 mortality and health-care resource availability. *The Lancet Global Health* 8:e480.

460 Keatinge W, Coleshaw S, Cotter F, Mattock M, Murphy M, Chelliah R. 1984. Increases in  
461 platelet and red cell counts, blood viscosity, and arterial pressure during mild surface  
462 cooling: Factors in mortality from coronary and cerebral thrombosis in winter. *Br Med J*  
463 *(Clin Res Ed)* 289:1405-1408.

464 Ma Y, Zhao Y, Liu J, He X, Wang B, Fu S, et al. 2020. Effects of temperature variation and  
465 humidity on the death of covid-19 in wuhan, china. *Science of The Total*  
466 *Environment*:138226.

467 Marijon E, Karam N, Jost D, Perrot D, Frattini B, Derkenne C, et al. 2020. Out-of-hospital  
468 cardiac arrest during the covid-19 pandemic in paris, france: A population-based,  
469 observational study. *The Lancet Public Health*.

470 Moghadamnia MT, Ardalan A, Mesdaghinia A, Keshtkar A, Naddafi K, Yekaninejad MS.  
471 2017. Ambient temperature and cardiovascular mortality: A systematic review and meta-  
472 analysis. *PeerJ* 5:e3574.

473 Mullins JT, White C. 2019. Temperature and mental health: Evidence from the spectrum  
474 of mental health outcomes. *Journal of health economics* 68:102240.

- 475 National Statistical Institute (Istat) and the Institute Superiore di Sanità (Iss). 2020. Impact  
476 of the covid-19 epidemic on total mortality of resident population period january-may  
477 2020. Available: <https://www.istat.it/it/archivio/245573>.
- 478 Pfefferbaum B, North CS. 2020. Mental health and the covid-19 pandemic. *New England*  
479 *Journal of Medicine*.
- 480 Pica N, Bouvier NM. 2014. Ambient temperature and respiratory virus infection. *The*  
481 *Pediatric infectious disease journal* 33:311-313.
- 482 Prem K, Liu Y, Russell TW, Kucharski AJ, Eggo RM, Davies N, et al. 2020. The effect of  
483 control strategies to reduce social mixing on outcomes of the covid-19 epidemic in  
484 wuhan, china: A modelling study. *The Lancet Public Health*.
- 485 Remuzzi A, Remuzzi G. 2020. Covid-19 and italy: What next? *The Lancet*.
- 486 Rosenbaum L. 2020. The untold toll—the pandemic's effects on patients without covid-  
487 19. *New England Journal of Medicine:Mass Medical Soc*.
- 488 Ryti NR, Guo Y, Jaakkola JJ. 2016. Global association of cold spells and adverse health  
489 effects: A systematic review and meta-analysis. *Environmental health perspectives*  
490 124:12-22.
- 491 Sajadi MM, Habibzadeh P, Vintzileos A, Shokouhi S, Miralles-Wilhelm F, Amoroso A. 2020.  
492 Temperature, humidity, and latitude analysis to estimate potential spread and seasonality  
493 of coronavirus disease 2019 (covid-19). *JAMA Network Open* 3:e2011834-e2011834.
- 494 Schwartz JD, Lee M, Kinney PL, Yang S, Mills D, Sarofim MC, et al. 2015. Projections of  
495 temperature-attributable premature deaths in 209 us cities using a cluster-based poisson  
496 approach. *Environmental Health* 14:85.
- 497 Song X, Wang S, Hu Y, Yue M, Zhang T, Liu Y, et al. 2017. Impact of ambient temperature  
498 on morbidity and mortality: An overview of reviews. *Science of the Total Environment*  
499 586:241-254.
- 500 Stocks JM, Taylor NA, Tipton MJ, Greenleaf JE. 2004. Human physiological responses to  
501 cold exposure. *Aviation, space, and environmental medicine* 75:444-457.
- 502 Vardoulakis S, Dear K, Hajat S, Heaviside C, Eggen B, McMichael AJ. 2014. Comparative  
503 assessment of the effects of climate change on heat-and cold-related mortality in the  
504 united kingdom and australia. *Environmental health perspectives* 122:1285-1292.
- 505 Vicedo-Cabrera AM, Sera F, Guo Y, Chung Y, Arbuthnott K, Tong S, et al. 2018. A multi-  
506 country analysis on potential adaptive mechanisms to cold and heat in a changing climate.  
507 *Environment international* 111:239-246.
- 508 Wang H, Zhang L. 2020. Risk of covid-19 for patients with cancer. *The Lancet Oncology*  
509 21:e181.
- 510 Wang X, Lei SM, Le S, Yang Y, Zhang B, Yao W, et al. 2020. Bidirectional influence of the  
511 covid-19 pandemic lockdowns on health behaviors and quality of life among chinese  
512 adults. *International Journal of Environmental Research and Public Health* 17:5575.
- 513 Weinberger DM, Chen J, Cohen T, Crawford FW, Mostashari F, Olson D, et al. 2020.  
514 Estimation of excess deaths associated with the covid-19 pandemic in the united states,  
515 march to may 2020. *JAMA Internal Medicine*.
- 516 Xie J, Zhu Y. 2020. Association between ambient temperature and covid-19 infection in  
517 122 cities from china. *Science of The Total Environment* 724:138201.
- 518 Xue T, Zhu T, Zheng Y, Zhang Q. 2019. Declines in mental health associated with air  
519 pollution and temperature variability in china. *Nature communications* 10:1-8.
- 520 Yang J, Zhou M, Ou C-Q, Yin P, Li M, Tong S, et al. 2017. Seasonal variations of

521 temperature-related mortality burden from cardiovascular disease and myocardial  
522 infarction in china. *Environmental Pollution* 224:400-406.  
523 Yao Y, Pan J, Liu Z, Meng X, Wang W, Kan H, et al. 2020. No association of covid-19  
524 transmission with temperature or uv radiation in chinese cities. *European Respiratory*  
525 *Journal* 55.  
526 Zhao Q, Li S, Coelho MS, Saldiva PH, Hu K, Arblaster JM, et al. 2019a. Geographic,  
527 demographic, and temporal variations in the association between heat exposure and  
528 hospitalization in brazil: A nationwide study between 2000 and 2015. *Environmental*  
529 *health perspectives* 127:017001.  
530 Zhao Q, Li S, Coelho MS, Saldiva PH, Hu K, Huxley RR, et al. 2019b. The association  
531 between heatwaves and risk of hospitalization in brazil: A nationwide time series study  
532 between 2000 and 2015. *PLoS medicine* 16:e1002753.  
533 Zhong C-B, Leonardelli GJ. 2008. Cold and lonely: Does social exclusion literally feel cold?  
534 *Psychological Science* 19:838-842.  
535 Zylke JW, Bauchner H. 2020. Mortality and morbidity: The measure of a pandemic. *JAMA*.  
536
